# Supplementary material for: Life Cycle Analysis of Succinic Acid Production in the Brazilian Biorefinery Context
Source: MDPI journal article supplement (doi:10.3390/su16031234), 2024-02-01
Supplement: s1 [file s1]

# Life Cycle Analysis of Succinic Acid Production in the Brazilian Biorefinery Context

Gabriel Baioni e Silva <sup>1,2</sup>, Andreza A. Longati <sup>3</sup>, Cíntia R. Sargo <sup>4</sup>, Felipe F. Furlan <sup>2,3</sup>, Rafael S. Capaz <sup>1</sup>, Electo E. S. Lora <sup>1</sup> and Thais S. Milessi <sup>1,2,3,\*</sup>

<sup>1</sup> Graduate Program of Energy Engineering, Federal University of Itajubá, Av. Benedito Pereira dos Santos, 1303, Itajubá 37500-903, MG, Brazil; rafacapaz@unifei.edu.br (R.S.C.)

<sup>2</sup> Graduate Program of Chemical Engineering, Federal University of São Carlos, Rodovia Washington Luíz, Km 235, São Carlos 13565-905, SP, Brazil;

<sup>3</sup> Department of Chemical Engineering, Federal University of São Carlos, Rodovia Washington Luíz, Km 235, São Carlos 13565-905, SP, Brazil

<sup>4</sup> Brazilian Biorenewables National Laboratory (LNBR/CNPEN), R. Giuseppe Máximo Scolfaro, 10000, Polo II de Alta Tecnologia, Campinas 13083-970, SP, Brazil; cintia.sargo@lnbr.cnpem.br

\* Correspondence: thais.milessi@ufscar.br

## 1. Inventories

### 1.1. Scenario 1

Developed from the simulation of the process. It uses sugarcane juice as carbon source for the fermentative process conducted by *E. coli* microorganisms. Table S1 presents data referring to the production stage.

**Table S1.** Inventory of the industrial stage of SA production from sugarcane.

| <b>INPUTS</b>                                                                                                                                                                     |          |     |
|-----------------------------------------------------------------------------------------------------------------------------------------------------------------------------------|----------|-----|
| Air                                                                                                                                                                               | 5,80E+01 | kg  |
| Sugarcane Juice {BR}                                                                                                                                                              | 1,56E+01 | kg  |
| Water, decarbonised {BR}   market for water, decarbonised   Cut-off, U                                                                                                            | 7,40E+01 | kg  |
| Sodium hydroxide, without water, in 50% solution state {GLO}   market for   Cut-off, U                                                                                            | 1,56E-02 | kg  |
| Zeolite, powder {GLO}   market for   Cut-off, U                                                                                                                                   | 4,30E-04 | kg  |
| Ammonia, anhydrous, liquid {RoW}   market for ammonia, anhydrous, liquid   Cut-off, U                                                                                             | 1,51E-02 | kg  |
| Electricity, high voltage {BR-South-eastern grid}   treatment of bagasse, from sugarcane, in heat and power co-generation unit, 6400kW thermal   Cut-off, U                       | 1,19E+00 | kWh |
| Heat, district or industrial, other than natural gas {BR-Southern grid}   treatment of bagasse, from sugarcane, in heat and power co-generation unit, 6400kW thermal   Cut-off, U | 1,18E+01 | MJ  |
| <b>OUTPUTS</b>                                                                                                                                                                    |          |     |
| Succinic acid {BR}   Sugarcane first generation process                                                                                                                           | 1,00E+00 | kg  |

The sugarcane juice inventory was adapted from OCAMPO BATTLE (2021) considering as input the sugarcane production inventory present in Ecoinvent for the southeast region of Brazil. The inputs and outputs can be seen in Table S2.

**Table S2.** Inventory of sugarcane juice production.

| <b>INPUTS</b>                                                                                                                 |          |     |
|-------------------------------------------------------------------------------------------------------------------------------|----------|-----|
| Sugarcane {BR-SP}  sugarcane production   Cut-off, U                                                                          | 1,14E+00 | kg  |
| Water, decarbonised {BR}  market for water, decarbonised   Cut-off, U                                                         | 3,43E-02 | kg  |
| Transport, freight, lorry >32 metric ton, EURO1 {BR}  market for transport, freight, lorry >32 metric ton, EURO1   Cut-off, U | 3,42E-0  | tkm |
| Electricity, medium voltage {BR-South-eastern grid}  market for electricity, medium voltage   Cut-off, U                      | 1,82E+01 | Wh  |
| <b>OUTPUTS</b>                                                                                                                |          |     |
| Sugarcane Juice {BR}                                                                                                          | 1,00E+00 | kg  |

To analyze the impacts of the upstream, fermentation and downstream stages of the sugarcane production process, the inputs were divided to generate 3 inventories corresponding to the stages (table S3).

**Table S3.** Distribution of inputs for each stage of the industrial process for producing SA from sugar cane.

| <b>INPUTS</b>                                                                                                                                                                    | <b>Upstream</b> | <b>Fermentation</b> | <b>Downstream</b> |     |
|----------------------------------------------------------------------------------------------------------------------------------------------------------------------------------|-----------------|---------------------|-------------------|-----|
| Air                                                                                                                                                                              | 2,76E+00        | -                   | 5,52E+01          | kg  |
| Water, decarbonised {BR}  market for water, decarbonised   Cut-off, U                                                                                                            | 4,71E+01        | 1,03E+01            | 1,66E+01          | kg  |
| Sugarcane Juice {BR}                                                                                                                                                             | 1,56E+01        | -                   | -                 | kg  |
| Sodium hydroxide, without water, in 50% solution state {GLO}  market for   Cut-off, U                                                                                            | -               | -                   | 1,56E-02          | kg  |
| Ammonia, anhydrous, liquid {RoW}  market for ammonia, anhydrous, liquid   Cut-off, U                                                                                             | -               | 1,51E-02            | -                 | kg  |
| Zeolite, powder {GLO}  market for   Cut-off, U                                                                                                                                   | -               | 4,30E-04            | -                 | kg  |
| Electricity, high voltage {BR-South-eastern grid}  treatment of bagasse, from sugarcane, in heat and power co-generation unit, 6400kW thermal   Cut-off, U                       | 0,00E+00        | 1,19E+00            | 3,98E-02          | kWh |
| Heat, district or industrial, other than natural gas {BR-Southern grid}  treatment of bagasse, from sugarcane, in heat and power co-generation unit, 6400kW thermal   Cut-off, U | 1,00E+00        | 7,75E+00            | 3,01E+00          | MJ  |

## 1.2. Scenario 2

**Table S4.** Inventory of the industrial step of SA production from sorghum.

|                                                                                                                               |          |                |
|-------------------------------------------------------------------------------------------------------------------------------|----------|----------------|
| <b>INPUTS</b>                                                                                                                 |          |                |
| Water, unspecified natural origin, BR-Southern grid                                                                           | 1,29E+00 | m <sup>3</sup> |
| Grain sorghum, at farm                                                                                                        | 1,66E+00 | kg             |
| Glucose {GLO}  market for glucose   Cut-off, U                                                                                | 1,30E-02 | kg             |
| Water, decarbonised {BR}  market for water, decarbonised   Cut-off, U                                                         | 1,67E+00 | kg             |
| Water, ultrapure {RoW}  market for water, ultrapure   Cut-off, U                                                              | 2,53E+01 | kg             |
| Ammonia, anhydrous, liquid {RoW}  market for ammonia, anhydrous, liquid   Cut-off, U                                          | 4,10E-01 | kg             |
| Heat, from steam, in chemical industry {RoW}  steam production, as energy carrier, in chemical industry   Cut-off, U          | 1,48E+01 | MJ             |
| Electricity, medium voltage {BR-South-eastern grid}  market for electricity, medium voltage   Cut-off, U                      | 2,67E+00 | kWh            |
| Transport, freight, lorry >32 metric ton, EURO1 {BR}  market for transport, freight, lorry >32 metric ton, EURO1   Cut-off, U | 4,98E-02 | tkm            |
| <b>OUTPUTS</b>                                                                                                                |          |                |
| Succinic Acid {BR}   Sorghum first generation process                                                                         | 1,00E+00 | kg             |
| Ammonium sulfate                                                                                                              | 1,49E+00 | kg             |
| <b>EMISSIONS</b>                                                                                                              |          |                |
| <b>To air</b>                                                                                                                 |          |                |
| Organic substances, unspecified                                                                                               | 2,00E-03 | kg             |
| Carbon monoxide                                                                                                               | 1,50E-02 | kg             |
| Nitrogen oxides                                                                                                               | 5,00E-03 | kg             |
| Particulates                                                                                                                  | 5,00E-03 | kg             |
| Ammonia                                                                                                                       | 1,72E-04 | kg             |
| Lead                                                                                                                          | 5,20E-06 | kg             |
| <b>To water</b>                                                                                                               |          |                |
| Sulfuric acid                                                                                                                 | 8,06E-05 | kg             |
| Waste water                                                                                                                   | 1,10E+01 | kg             |
| <b>Residual</b>                                                                                                               |          |                |
| Waste, organic                                                                                                                | 1,22E+00 | kg             |

The inventory (Table S5) of the agricultural stage of sorghum production was adapted for the southeastern region of Brazil.

**Table S5.** Inventory of the agricultural stage of sorghum production in Brazil.

|                                                                                      |          |                  |
|--------------------------------------------------------------------------------------|----------|------------------|
| <b>INPUTS</b>                                                                        |          |                  |
| Carbon dioxide, in air                                                               | 3,92E-03 | kg               |
| Transformation, to arable land, unspecified use                                      | 3,39E-03 | m <sup>2</sup>   |
| Occupation, arable land, unspecified use                                             | 3,38E-03 | m <sup>2</sup> a |
| Urea, as N {GLO}  market for   Cut-off, U                                            | 1,40E-01 | kg               |
| Limestone, crushed, washed {RoW}  market for limestone, crushed, washed   Cut-off, U | 1,56E-02 | kg               |
| Maize seed, organic, at farm {GLO}  market for   Cut-off, U                          | 5,90E+00 | kg               |
| Glyphosate {GLO}  market for   Cut-off, U                                            | 1,04E+00 | kg               |
| Atrazine {GLO}  market for   Cut-off, U                                              | 9,88E-01 | kg               |
| Pesticide, unspecified {GLO}  market for   Cut-off, U                                | 2,01E-02 | kg               |
| Diesel {BR}  market for diesel   Cut-off, U                                          | 1,98E-01 | kg               |

|                                                                                                      |          |     |
|------------------------------------------------------------------------------------------------------|----------|-----|
| Electricity, high voltage {BR-South-eastern grid}  market for electricity, high voltage   Cut-off, U | 3,33E+00 | kWh |
| <b>OUTPUTS</b>                                                                                       |          |     |
| Sorghum Grain, at farm                                                                               | 1,00E+00 | ton |
| <b>EMISSIONS</b>                                                                                     |          |     |
| <b>To air</b>                                                                                        |          |     |
| Carbon dioxide, fossil                                                                               | 9,28E-01 | kg  |
| Carbon dioxide, land transformation                                                                  | 4,14E-03 | kg  |
| Dinitrogen monoxide                                                                                  | 9,68E-01 | kg  |
| Nitrogen oxides                                                                                      | 1,16E+00 | kg  |
| Ammonia                                                                                              | 3,33E+00 | kg  |
| NMVOC, non-methane volatile organic compounds                                                        | 6,75E-02 | kg  |
| Carbon monoxide, fossil                                                                              | 1,22E-01 | kg  |
| Sulfur dioxide                                                                                       | 2,28E-02 | kg  |
| Methane, fossil                                                                                      | 2,91E-03 | kg  |
| Benzene                                                                                              | 1,64E-04 | kg  |
| Cadmium                                                                                              | 2,25E-07 | kg  |
| Chromium                                                                                             | 1,13E-06 | kg  |
| Copper                                                                                               | 3,84E-05 | kg  |
| Nickel                                                                                               | 1,58E-06 | kg  |
| Zinc                                                                                                 | 2,25E-05 | kg  |
| Benzopyrene, methyl-                                                                                 | 6,75E-08 | kg  |
| Selenium                                                                                             | 2,25E-08 | kg  |
| Benz[a]anthracene,12-methyl-                                                                         | 1,80E-06 | kg  |
| Benzo(a)fluoranthene                                                                                 | 1,13E-06 | kg  |
| Cresol                                                                                               | 4,52E-06 | kg  |
| Dibenz(a,h)anthracene                                                                                | 2,25E-07 | kg  |
| Fluoranthene                                                                                         | 1,01E-05 | kg  |
| Phenanthrene                                                                                         | 5,62E-05 | kg  |
| <b>To water</b>                                                                                      |          |     |
| Cadmium                                                                                              | 4,66E-11 | kg  |
| Copper                                                                                               | 7,57E-08 | kg  |
| Zinc                                                                                                 | 8,67E-08 | kg  |
| Lead                                                                                                 | 1,01E-09 | kg  |
| Chromium                                                                                             | 1,48E-07 | kg  |
| <b>To field</b>                                                                                      |          |     |
| Cadmium                                                                                              | 4,66E-06 | kg  |
| Copper                                                                                               | 7,57E-04 | kg  |
| Zinc                                                                                                 | 8,67E-04 | kg  |
| Lead                                                                                                 | 1,01E-05 | kg  |
| Chromium                                                                                             | 1,48E-03 | kg  |
| Glyphosate                                                                                           | 1,04E+00 | kg  |
| Atrazine                                                                                             | 9,88E-01 | kg  |
| Thiamethoxam                                                                                         | 2,01E-02 | kg  |
| Lambda-cyhalothrin                                                                                   | 1,58E-02 | kg  |

### 1.3. Scenario 3

The inventory referring to the 3<sup>rd</sup> scenario does not consider obtaining the apple pomace, since it is residue from another process. Thus, considering only the industrial stage.

**Table S6.** Inventory of the industrial stage of second-generation SA production in Brazil

|                                                                                                                               |          |     |
|-------------------------------------------------------------------------------------------------------------------------------|----------|-----|
| <b>INPUTS</b>                                                                                                                 |          |     |
| Tap water {BR}  market for tap water   Cut-off, U                                                                             | 2,29E-02 | kg  |
| Glucose {GLO}  market for glucose   Cut-off, U                                                                                | 5,93E-02 | kg  |
| Corn steep liquor/kg/RNA                                                                                                      | 1,48E-02 | kg  |
| Carbon dioxide, in chemical industry {GLO}  market for carbon dioxide, in chemical industry   Cut-off, U                      | 1,25E-02 | kg  |
| Chemical, inorganic {GLO}  market for chemical, inorganic   Cut-off, U                                                        | 2,50E-01 | kg  |
| Sodium chloride, powder {GLO}  market for   Cut-off, U                                                                        | 2,51E-01 | kg  |
| Sulfuric acid {RoW}  market for sulfuric acid   Cut-off, U                                                                    | 8,31E-01 | kg  |
| Natural gas liquids {GLO}  market for   Cut-off, U                                                                            | 3,12E-01 | kg  |
| Enzymes {GLO}  market for enzymes   Cut-off, U                                                                                | 1,35E-02 | kg  |
| Chemical, organic {GLO}  market for   Cut-off, U                                                                              | 4,70E-02 | kg  |
| Electricity, medium voltage {BR-South-eastern grid}  market for electricity, medium voltage   Cut-off, U                      | 7,87E-02 | kWh |
| Transport, freight, lorry >32 metric ton, EURO1 {BR}  market for transport, freight, lorry >32 metric ton, EURO1   Cut-off, U | 5,40E-02 | tkm |
| <b>OUTPUTS</b>                                                                                                                |          |     |
| Succinic Acid {BR}   Apple pomace second generation                                                                           | 1,00E+00 | kg  |
| <b>EMISSIONS</b>                                                                                                              |          |     |
| <b>to air</b>                                                                                                                 |          |     |
| Methane                                                                                                                       | 3,56E-05 | kg  |
| Carbon monoxide                                                                                                               | 5,33E-04 | kg  |
| Ethanol                                                                                                                       | 2,68E-06 | kg  |
| Nitrogen monoxide                                                                                                             | 8,89E-06 | kg  |
| Sulfur oxides                                                                                                                 | 9,79E-06 | kg  |
| Particulates                                                                                                                  | 1,78E-06 | kg  |
| Nitrogen oxides                                                                                                               | 3,56E-04 | kg  |
| <b>to water</b>                                                                                                               |          |     |
| Waste water                                                                                                                   | 2,41E-02 | kg  |
| <b>Residual</b>                                                                                                               |          |     |
| Waste, unspecified                                                                                                            | 8,85E-01 | kg  |

## 1.4. Scenario 4

Inventory (Table S7) adapted from ecoinvent for the Brazilian scenario considering the chemical route of SA production from maleic anhydride.

**Table S7.** Inventory of SA production from the chemical route

|                                                                                                              |          |                |
|--------------------------------------------------------------------------------------------------------------|----------|----------------|
| <b>INPUTS</b>                                                                                                |          |                |
| Water, unspecified natural origin, BR-Southern grid                                                          | 0,01809  | m <sup>3</sup> |
| Maleic Anhydride {BR}  production by catalytic oxidation of benzene                                          | 8,74E-01 | kg             |
| Hydrogen, gaseous {BR}  hydrogen production, gaseous, petroleum refinery operation   Cut-off, U              | 1,80E-02 | kg             |
| Water, decarbonised {BR}  market for water, decarbonised   Cut-off, U                                        | 1,87E-01 | kg             |
| Metal catalyst for catalytic converter {GLO}  market for metal catalyst for catalytic converter   Cut-off, U | 4,97E-05 | kg             |
| Nitrogen, liquid {RoW}  market for   Cut-off, U                                                              | 1,90E-02 | kg             |
| Electricity, medium voltage {BR-Southern grid}  market for electricity, medium voltage   Cut-off, U          | 4,16E-01 | kWh            |
| Heat, district or industrial, natural gas {GLO}  market group for   Cut-off, U                               | 2,35E+00 | MJ             |
| <b>OUTPUTS</b>                                                                                               |          |                |
| Succinic Acid {BR}   Chemical route                                                                          | 1,00E+00 | kg             |
| <b>EMISSIONS</b>                                                                                             |          |                |
| <b>To air</b>                                                                                                |          |                |
| Carbon dioxide, fossil                                                                                       | 7,45E-02 | kg             |
| Hydrogen                                                                                                     | 8,98E-04 | kg             |
| Nitrogen, atmospheric                                                                                        | 1,90E-02 | kg             |
| Water/m3                                                                                                     | 1,67E-02 | m <sup>3</sup> |
| <b>To water</b>                                                                                              |          |                |
| Maleic anhydride                                                                                             | 2,19E-03 | kg             |
| Water, BR-South-eastern grid                                                                                 | 1,67E-02 | m <sup>3</sup> |
| <b>To technologic sphere</b>                                                                                 |          |                |
| Wastewater, average {RoW}  market for wastewater, average   Cut-off, U                                       | 2,74E-06 | m <sup>3</sup> |

Inventory (Table S8) adapted from ecoinvent for the Brazilian scenario considering the production of maleic anhydride from the catalytic oxidation of benzene.

**Table S8.** Inventory maleic anhydride production.

|                                                                                                          |          |     |
|----------------------------------------------------------------------------------------------------------|----------|-----|
| <b>INPUTS</b>                                                                                            |          |     |
| Water, cooling, unspecified natural origin, BR-Southern grid                                             | 1,46E-02 | kg  |
| Water, river                                                                                             | 7,66E-04 | kg  |
| Water, well                                                                                              | 7,39E-04 | kg  |
| Benzene {GLO}  market for   Cut-off, U                                                                   | 1,02E+00 | kg  |
| Chemical factory {GLO}  market for   Cut-off, U                                                          | 3,56E-10 | kg  |
| Tap water {BR}  market for tap water   Cut-off, U                                                        | 2,32E-01 | kg  |
| Electricity, medium voltage {BR-South-eastern grid}  market for electricity, medium voltage   Cut-off, U | 5,34E-01 | kWh |
| <b>OUTPUTS</b>                                                                                           |          |     |
| Maleic Anhydride {BR}  production by catalytic oxidation of benzene                                      | 1        | kg  |

## 2. Figures

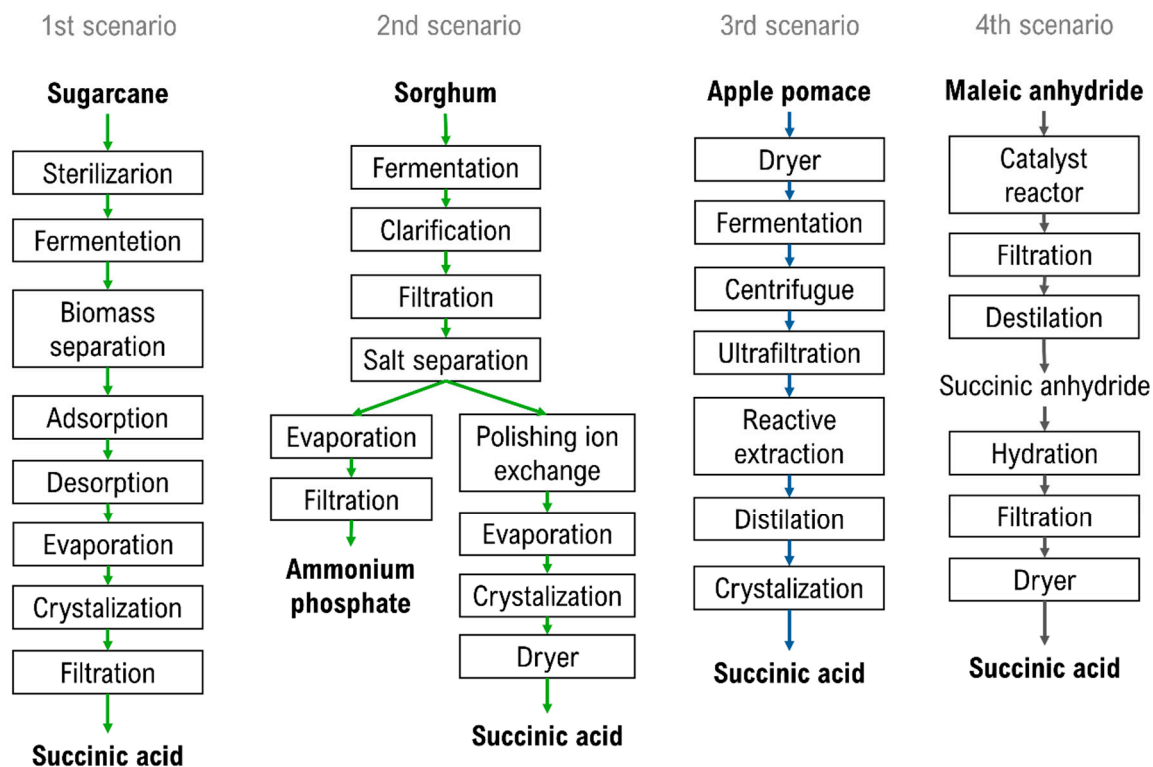

**Figure S1.** Flowchart of succinic acid production from: first generation sugarcane; first generation sorghum; second generation apple pomace and chemical route maleic anhydride.
